# Supplementary material for: Dietary cadmium exposure assessment among the Chinese population
Source: PLoS One. 2017 May 18;12(5):e0177978. doi: 10.1371/journal.pone.0177978 (PMC5436861; doi:10.1371/journal.pone.0177978)
Supplement: S1 File — (XLSX) [file pone.0177978.s001.xlsx]

## Sheet: Sheet1
Food consumption
		mean:weight	mean:rice	mean:wheat	mean:other cereals	mean:nut	mean:freshwater fish	mean:sea fish	mean:molluscs	mean:freshwater shrimp	mean:sea shrimp	mean:freshwater crab	mean:sea crab	mean:roots	mean:leaf	mean:cucurbits and fruit vegetable	mean:legume	mean:mushroom_fresh	mean:mushr_dry	mean:fungi	mean:kelp and purple seaweed	mean:meat_stock	mean:meat_poultry	mean:liver	mean:kidney	mean:fresh egg	mean:preserved egg	mean:milk	mean:milk powder	mean:fruit	mean:juice	mean:tea	mean:tea
	4-11yr	22.7867	162.558	95.7528	10.532	2.85387	4.29724	10.3883	0.830772	0.437572	1.02278	0.333323	0.382558	23.6145	86.4608	51.1066	1.97351	1.23652	0.267666	0.643747	0.279319	46.8981	9.52797	0.683089	0.0621472	17.0342	0.422378	21.3409	0.666	43.7169	0.722878	0.183182	0.188
	12-17yr,male	45.2669	237.311	151.861	15.7048	3.78053	7.54523	15.2199	1.98156	0.586496	1.35574	0.391028	0.654111	30.738	120.743	74.692	2.55405	1.54395	0.413098	0.652329	0.353329	65.8259	13.3174	1.00541	0.0802126	19.2043	0.465896	21.0677	0.306908	45.0687	0.812379	0.211222	0.211
	12-17yr,female	44.181	195.282	138.27	16.0486	3.49341	5.83858	12.0438	1.7591	0.466413	1.31882	0.575968	0.580927	28.7825	108.515	70.4468	2.58961	1.38458	0.42548	0.620449	0.294064	54.3723	11.8211	0.701737	0.0265291	17.462	0.367246	21.0236	0.366051	48.828	0.958234	0.20789	0.208
	≥18yr,male	63.5286	247.348	169.914	17.89	4.38225	8.83019	18.1528	1.97778	0.8955	1.93457	0.751988	0.984771	37.8327	137.021	83.1543	3.04542	2.33055	0.515321	1.13579	0.614365	75.4151	14.7305	1.22789	0.124111	22.6336	0.674493	20.9075	0.546045	33.2843	0.271119	0.801828	0.802
	≥18yr,female	55.9125	212.227	140.363	17.5444	3.69024	7.69834	15.3146	1.5514	0.779001	1.66336	0.750818	0.863799	35.4586	127.174	77.6768	2.53698	2.19292	0.480439	1.08808	0.610677	60.5381	12.3138	0.961747	0.0817733	20.6965	0.645533	20.9351	0.536908	41.0351	0.408778	0.410365	0.41
	General population	53.1211	218.64	145.408	16.549	3.82316	7.55706	15.5312	1.63527	0.752608	1.64527	0.669411	0.819965	34.191	124.06	75.5519	2.64737	2.04758	0.45824	1.0047	0.541258	64.078	12.8365	1.01189	0.0922389	20.6961	0.605566	20.9912	0.540711	39.0731	0.44291	0.504551	0.512
		SD:weight	SD:rice	SD:wheat	SD:other cereals	SD:nut	SD:freshwater fish	SD:sea fish	SD:molluscs	SD:freshwater shrimp	SD:sea shrimp	SD:freshwater crab	SD:sea crab	SD:roots	SD:leaf	SD:cucurbits and fruit vegetable	SD:legume	SD:mushroom_fresh	SD:mushr_dry	SD:fungi	SD:kelp and purple seaweed	SD:meat_stock	SD:meat_poultry	SD:liver	SD:kidney	SD:fresh egg	SD:preserved egg	SD:milk	SD:milk powder	SD:fruit	SD:juice	SD:tea	SD:tea
	4-11yr	7.86196	128.559	119.27	34.6462	13.814	19.3766	28.8933	7.22795	5.0311	8.07127	4.69385	5.07853	45.1068	85.1633	80.5205	12.5539	8.40752	4.39741	5.0917	2.69495	55.6846	28.4144	5.61002	1.44331	28.4014	4.45475	72.5751	7.94665	87.2877	9.87307	4.91993	5.027
	12-17yr,male	11.0721	180.122	173.867	56.9546	16.2756	29.1108	40.8746	15.0916	6.5598	10.3528	6.27309	8.24842	55.8604	115.288	117.29	17.8579	9.801	4.71639	5.07456	3.12708	75.5859	40.931	7.07519	2.02102	32.3427	4.83004	76.0272	4.44958	100.876	10.2882	7.33247	7.332
	12-17yr,female	9.00832	159.237	154.291	53.2787	16.7166	22.6624	32.8111	11.8431	5.09779	9.68676	7.40619	7.35	53.5616	104.413	113.061	15.1294	8.99337	5.44324	4.90529	2.91367	64.5161	34.4555	5.36457	0.877815	29.2533	3.75688	72.0224	5.06635	96.8157	11.6854	6.04618	6.046
	≥18yr,male	10.7189	191.932	189.605	53.1082	16.7891	30.275	43.1201	13.6846	7.69458	12.27	7.96303	10.1528	64.8224	123.962	120.411	17.6413	11.9131	5.36052	7.8523	5.07022	80.9487	38.579	8.2712	2.3008	34.7893	5.44307	72.141	7.11417	76.4966	6.9662	15.6791	15.679
	≥18yr,female	9.49675	166.859	157.834	50.2683	15.1646	26.7513	37.987	10.7107	6.54812	10.5425	7.55061	8.93893	61.1881	115.299	113.623	15.5175	11.7576	4.90738	7.74538	4.77752	67.8711	34.1605	6.68246	1.75922	32.4648	5.13299	69.4077	6.78007	84.6774	7.25356	9.85991	9.86
	General population	16.5352	174.537	168.045	50.0129	15.7272	27.2384	38.8985	11.7879	6.76447	10.8794	7.321	8.90475	60.2667	115.7	112.859	16.0693	11.2284	5.02647	7.27089	4.5331	72.3811	35.5209	7.15245	1.92652	32.7429	5.10101	71.2794	6.93079	83.6664	7.95194	11.7052	11.807
		mean:weight	mean:rice	mean:wheat	mean:other cereals	mean:nut	mean:freshwater fish	mean:sea fish	mean:molluscs	mean:sea shrimp	mean:freshwater shrimp	mean:freshwater crab	mean:sea crab	mean:roots	mean:leaf	mean:cucurbits and fruit vegetable	mean:legume	mean:mushroom_fresh	mean:mushr_dry	mean:fungi	mean:kelp and purple seaweed	mean:meat_stock	mean:meat_poultry	mean:liver	mean:kidney	mean:fresh egg	mean:preserved egg	mean:milk	mean:milk powder	mean:fruit	mean:juice	mean:tea	mean:tea
north	4-11yr	23.931	77.8382	177.642	18.0188	2.57943	4.74276	2.15099	0.28011	0.100702	0.633108	0.112842	0.204038	20.9919	61.4496	57.2029	0.831402	0.983747	0.143592	0.455907	0.236895	28.4604	4.43138	0.265613	0.00208177	21.5368	0.343416	30.3186	0.756007	47.6774	0.832305	0.259619	0.249
north	12-17yr,male	47.0372	125.327	265.747	24.1897	3.69871	7.90068	5.00748	0.980557	0.106594	1.09714	0.0906186	0.218151	27.8264	84.4545	88.6566	1.00258	1.1242	0.34446	0.347247	0.407138	42.491	7.68919	0.442148	0.0226377	24.9324	0.319307	26.2539	0.45119	49.9024	0.491842	0.356968	0.357
north	12-17yr,female	45.7765	104.745	229.057	22.9121	2.79707	6.73343	3.28054	0.767959	0.107169	1.00176	0.424214	0.283175	24.9086	80.3455	78.493	1.28032	0.706364	0.475128	0.575128	0.36635	36.7615	7.03211	0.348061	0	20.7294	0.165106	25.2267	0.458157	55.8583	1.01178	0.375786	0.376
north	≥18yr,male	66.3002	133.155	286.876	31.2223	4.14164	9.23259	6.82438	1.39525	0.246771	1.35943	0.246763	0.598966	30.7413	103.095	92.1936	1.73659	1.62209	0.427371	0.850848	0.567626	49.7519	8.11541	0.558323	0.0815265	29.2965	0.577251	27.9042	0.647424	37.6634	0.299281	0.772637	0.773
north	≥18yr,female	58.5915	112.895	234.839	30.3582	3.33122	7.78418	5.60604	0.928175	0.227267	1.11908	0.219696	0.461243	27.6397	95.4229	85.104	1.50618	1.49942	0.362682	0.805564	0.552985	38.0654	6.50503	0.408509	0.0184414	26.0636	0.511815	26.2935	0.601314	47.0182	0.386887	0.485108	0.485
north	General population	56.1435	116.356	248.354	28.5719	3.53491	7.91121	5.51052	1.01818	0.208467	1.14299	0.219419	0.462444	27.8721	92.977	84.201	1.47681	1.4314	0.363781	0.749028	0.505159	41.3842	6.92602	0.445739	0.0393421	26.436	0.492189	27.341	0.624654	44.1178	0.440017	0.554101	0.558
south	4-11yr	21.9743	222.704	37.6165	5.21684	3.0487	14.3963	5.82094	1.22171	0.676727	1.29943	0.48985	0.509295	25.4764	104.217	46.7787	2.78433	1.41597	0.355751	0.777101	0.309437	59.9878	13.1462	0.979469	0.10479	13.8376	0.478437	14.9673	0.602101	40.9053	0.645192	0.128917	0.144
south	12-17yr,male	43.7599	332.639	54.914	8.48171	3.85017	21.4506	9.70556	2.83368	0.995023	1.57587	0.646759	1.02523	33.2165	151.634	62.8043	3.87477	1.90127	0.471528	0.912037	0.307523	85.6903	18.1085	1.4849	0.129225	14.3281	0.590683	16.6528	0.184086	40.9538	1.08524	0.0871528	0.087
south	12-17yr,female	42.6187	283.937	49.3698	9.32758	4.17529	17.2439	8.34348	2.72966	0.818195	1.6293	0.72457	0.872493	32.5759	136.099	62.5677	3.8717	2.04871	0.376862	0.664828	0.223281	71.6172	16.5106	1.04807	0.0525072	14.2625	0.565186	16.9078	0.27586	41.9438	0.905802	0.0434814	0.043
south	≥18yr,male	60.9756	352.538	62.1723	5.60887	4.60388	26.3697	10.6779	2.51439	1.49308	2.46437	1.21738	1.34016	44.365	168.272	74.8275	4.25107	2.98315	0.596336	1.39826	0.657419	99.055	20.824	1.84466	0.163338	16.496	0.764069	14.4624	0.452658	29.2504	0.245178	0.828717	0.829
south	≥18yr,female	53.4297	304.282	52.8071	5.66917	4.02295	22.2934	9.63739	2.12897	1.29032	2.16777	1.24304	1.23687	42.7048	156.6	70.7937	3.49229	2.83562	0.589571	1.34991	0.664143	81.3648	17.697	1.47446	0.140466	15.7225	0.769457	15.9692	0.477219	35.4903	0.429066	0.341096	0.341
south	General population	50.4318	309.652	53.8067	5.85101	4.07966	22.3114	9.37808	2.18435	1.23679	2.09221	1.06982	1.13809	39.8137	151.718	67.8559	3.68894	2.59586	0.542291	1.2322	0.573379	84.2711	18.0957	1.51565	0.139307	15.5888	0.706448	15.3412	0.466018	34.5844	0.445484	0.46046	0.47
		SD:weight	SD:rice	SD:wheat	SD:other cereals	SD:nut	SD:freshwater fish	SD:sea fish	SD:molluscs	SD:sea shrimp	SD:freshwater shrimp	SD:freshwater crab	SD:sea crab	SD:roots	SD:leaf	SD:cucurbits and fruit vegetable	SD:legume	SD:mushroom_fresh	SD:mushr_dry	SD:fungi	SD:kelp and purple seaweed	SD:meat_stock	SD:meat_poultry	SD:liver	SD:kidney	SD:fresh egg	SD:preserved egg	SD:milk	SD:milk powder	SD:fruit	SD:juice	SD:tea	SD:tea
north	4-11yr	8.25087	94.9295	132.931	36.7634	12.3734	19.26	11.785	3.51063	2.30744	5.88896	2.77822	3.71238	40.4035	67.9573	84.4307	6.29142	7.61013	2.06701	4.32317	2.18498	44.7098	20.877	3.26823	0.131448	32.1998	3.34678	91.9174	8.3717	88.9974	12.4155	5.3531	5.152
north	12-17yr,male	11.1956	143.124	179.515	48.717	17.2185	31.1712	23.5181	8.68309	2.42442	8.44578	2.53235	3.58113	53.62	84.5691	124.837	8.63501	7.94686	4.14916	3.08869	3.32866	60.1906	37.2044	4.6571	0.868236	36.5325	5.14296	92.4375	5.54337	105.943	7.35002	10.4524	10.452
north	12-17yr,female	9.04908	118.852	158.61	50.4415	14.7694	25.6241	14.7717	6.77503	2.21989	8.4206	8.13688	4.70765	47.906	83.0868	114.137	7.66456	5.50984	4.88031	5.01639	3.56155	53.5302	26.9911	3.75645	0	30.7246	1.87753	84.3612	5.06345	104.025	12.7517	8.48549	8.485
north	≥18yr,male	10.7687	149.239	195.792	59.3639	17.6485	31.386	26.1363	11.0656	3.68209	9.02842	4.78903	8.26475	57.9997	100.152	123.338	11.4368	9.57739	5.0173	7.00552	4.63563	65.2925	27.4797	5.49929	2.00265	39.5097	4.96144	88.1675	8.34667	81.895	8.44697	16.5059	16.506
north	≥18yr,female	9.53324	125.445	164.979	56.4905	15.3267	27.72	22.404	8.27243	3.25725	7.55606	4.43851	7.11709	52.7657	93.72	114.647	10.2602	9.79894	4.09456	6.99116	4.20784	52.5383	23.8613	4.46924	0.910594	36.3579	4.57475	82.2374	7.4708	91.5825	7.10276	10.7888	10.789
north	General population	16.5898	133.386	177.75	55.1772	15.9913	28.4017	22.7466	9.00812	3.25687	8.04398	4.5597	7.05709	53.3966	93.5688	115.74	10.1707	9.24914	4.32274	6.51805	4.12629	57.635	25.8276	4.74295	1.37005	36.9864	4.54248	86.2724	7.76644	89.2292	8.71089	12.711	12.79
south	4-11yr	7.4688	114.679	60.3327	32.0186	14.7496	33.5496	23.1918	8.95667	6.27436	9.30589	5.66906	5.85515	48.0846	91.4594	77.3415	15.4863	8.92682	5.4787	5.56989	3.00474	58.913	32.2448	6.78421	1.88299	24.8749	5.09676	53.9592	7.63065	85.9506	7.56664	4.58737	4.936
south	12-17yr,male	10.7414	151.222	89.9825	62.2344	15.4323	46.7149	32.9895	18.8678	8.62073	11.7324	8.20179	10.7132	57.5986	128.251	109.096	22.8752	11.1287	5.15074	6.27839	2.94484	81.4688	43.2922	8.58691	2.62996	27.3732	4.54451	58.2059	3.23631	96.192	12.2417	2.55574	2.556
south	12-17yr,female	8.69196	143.087	80.707	55.113	18.4049	37.8667	28.1159	15.1937	6.81011	10.7775	6.6125	9.22428	58.3415	115.268	111.477	19.8079	11.3806	5.94439	4.79539	2.09225	69.5246	39.9084	6.55129	1.23462	27.3724	4.94104	57.1595	5.06937	88.6919	10.5416	1.34814	1.348
south	≥18yr,male	10.0161	164.862	97.6974	43.1043	15.9541	50.2393	33.5348	15.6969	10.0258	14.6142	10.0123	11.6127	69.8939	135.079	117.039	21.7807	13.6851	5.65726	8.55038	5.43974	86.5832	45.6771	10.1383	2.54416	28.4385	5.85052	52.4544	5.74841	70.9266	5.24467	14.8775	14.878
south	≥18yr,female	8.75983	146.435	82.6855	40.2274	15.0057	44.3514	30.0982	12.5271	8.49952	12.6773	9.54411	10.331	67.2646	125.198	112.232	19.092	13.286	5.5534	8.37572	5.25015	73.5931	40.75	8.18444	2.27763	27.4643	5.59819	54.4376	6.06982	77.3233	7.39076	8.91288	8.913
south	General population	16.0142	155.39	86.2113	42.1298	15.4842	45.2116	30.5727	13.7751	8.74864	12.8718	9.08014	10.2627	65.2676	126.029	109.661	19.8406	12.7085	5.57722	7.87365	4.86641	77.9685	41.6193	8.72487	2.31067	27.4487	5.54905	53.9557	6.09072	78.1131	7.20989	10.7313	10.851
